# Supplementary material for: An mTORC1-to-CDK1 Switch Maintains Autophagy Suppression during Mitosis
Source: PubMed Central journal article supplement — Mol Cell. 2020 Jan 16;77(2):228–240.e7. doi: 10.1016/j.molcel.2019.10.016 (PMC6964153; doi:10.1016/j.molcel.2019.10.016), 2020-01-16
Supplement: mmc1.pdf [file mmc1.pdf]

**Molecular Cell, Volume 77**

**Supplemental Information**

**An mTORC1-to-CDK1 Switch Maintains**

**Autophagy Suppression during Mitosis**

**Richard I. Odle, Simon A. Walker, David Oxley, Andrew M. Kidger, Kathryn Balmanno, Rebecca Gilley, Hanneke Okkenhaug, Oliver Florey, Nicholas T. Ktistakis, and Simon J. Cook**

## Supplementary Figure Legends

**Figure S1 (accompanying main figure 1): Autophagy initiation is repressed during mitosis (A)** Montage from movie S1. HEK-293 cells expressing the tandem LC3 reporter mRFP-EGFP-LC3 were treated with paclitaxel for 4 hours prior to transfer to live-cell imaging stage. Representative images from before and one hour after addition of AZD8055 are shown (1  $\mu$ M). Images from two fields of view are shown, with mitotically arrested cell indicated with arrow. **(B)** Asynchronous HEK293 GFP-ATG13 cells were either left untreated, treated with AZD8055 (1  $\mu$ M), or incubated in starvation media for 2 hours. **(C)** Asynchronous HeLa cells were either left untreated, treated with AZD8055 (1  $\mu$ M), or incubated in starvation media for 2 hours. Primary antibodies used: WIPI2 (green), p-S10 H3 (magenta). Scale bars: 20  $\mu$ m

**Figure S2 (accompanying Figure 2): Hyperphosphorylated Raptor is localised predominantly to the cytosol, not membrane, fraction.** HeLa cells were treated with paclitaxel (t=16hrs; 50nM) and/ AZD8055 (t=2 hrs; 1  $\mu$ M). Lysates were then fractionated into membrane and cytosol enriched fractions, with LAMP2 and ERK1/2 serving as the respective loading controls. Western blots are from a single biological replicate representative of three independent experiments.

**Figure S3 (accompanying Figure 3): The EG5 inhibitor dimethylenastron also promotes hyperphosphorylation of autophagy regulators.** (a) HCT116 cells were treated with Dimethylenastron (1  $\mu$ M) for 16hrs. Two hours prior to lysis, cells were treated with either DMSO control or RO-3306 (2  $\mu$ M). Western blots are from a single experiment representative of three independent experiments.

**Figure S4 (accompanying Figure 4): Mitotic phosphorylation of autophagy regulators is observed across a diverse panel of cell lines.** Cells were treated with Paclitaxel (50 nM) for 16hrs. Two hours prior to lysis cells were treated with either DMSO, RO-3306 (2  $\mu$ M; CDK1 inhibitor), Trametinib (1  $\mu$ M; MEK inhibitor) or AZD8055 (1  $\mu$ M; mTOR inhibitor). Cell lines used were as follows: COLO205 (A), A549 (B), HEK293 (C), HT29 (D). Western blots are from a single experiment representative of three independent experiments.

**Figure S5 (accompanying figure 4): Paclitaxel-induced hyperphosphorylation of autophagy regulators can be shown to be mTORC1 independent by multiple methodologies.** **(A)** SW620 and 8055R cells were cultured in their respective media and treated with paclitaxel (16 hrs; 50 nM). **(B)** CO115 cells were transfected with indicated siRNA constructs (25nM) for 48 hours. **(C)** HCT116 cells were treated with Paclitaxel (50 nM) for 16 hrs. Two hours prior to lysis cells were treated with either DMSO or ZSTK474 (1 $\mu$ M; PI3K class I/II inhibitor) and had their media maintained or swapped for HBSS + 1% BSA. **(D)** HeLa cells stably expressing either wild-type (WT) or  $\Delta$ 30-TFEB-GFP were treated with AZD8055 (1 $\mu$ M) or incubated in starvation media for 2 hours. An antibody against Lamp2 was used for visualisation of lysosomes (magenta). **(E)** A representative mitotic WT-TFEB-GFP cell from the AZD8055 treatment arm of (D). Images are representative of the majority cells across two independent experiments. Scale bars: 20  $\mu$ m **(F)** HeLa cells stably expressing either wild-type (WT) or  $\Delta$ 30-TFEB-GFP were treated with paclitaxel (50nM; t=16hrs) prior to mitotic shake-off. Adherent interphase-enriched (I) and suspension mitosis-enriched (M) fractions are indicated. Western blots are from a single experiment representative of three independent experiments.

**Figure S6 (accompanying Figure 5). HeLa cells also exhibit mTOR-independent hyperphosphorylation of autophagy regulators in response to paclitaxel.** **(A)** Propidium iodide analysis of HT29 cells run in parallel with (Figure 5A). **(B)** HeLa cells were treated with

paclitaxel (t= 16hrs; 50 nM) and/ AZD8055 (t=2 hrs; 1  $\mu$ M). Western blots were acquired using a fluorescent-based LiCOR Odyssey system and are from a single experiment representative of three independent experiments. **(C)** Panel demonstrates an example image (Untreated HAP1) of all the parameters utilised for analysis in (D). **(D)** Indicated cell lines were treated as indicated for two hours: paclitaxel (50nM), AZD8055 (1 $\mu$ M), HBSS + 1% BSA. Cells were then fixed and immunostained for p-ULK1 (S758) and p-H3 (S10). Representative P-ULK (S758) images from all cell lines and treatment conditions are shown. P-H3 (S10) positive cells are indicated by arrow for the other representative images. **(E)** Quantification of mean p-ULK1 (S758) intensity from (D) for different p-H3 (S10) sub-populations is shown. P-values calculated using Two-way Anova (Tukey). \* p<0.05; \*\* p<0.01.

**Figure S7 (accompanying Figure 6): Phosphorylation of ATG14 at S29, an ULK1 target site and critical autophagy initiation event, is repressed during mitosis.**

**(A)** HCT116 cells were treated with paclitaxel (50nM; t=16hrs) and/or AZD8055 (1  $\mu$ M; t=2hrs). **(B)** Quantification from fluorescent western blotting is provided. P-values calculated using One-way Anova (Tukey). Mean +/- S.D. across three independent experiments \* p<0.05; \*\* p<0.01; \*\*\* p<0.001; \*\*\*\* p<0.0001.

Figure S1 (related to Figure 1)

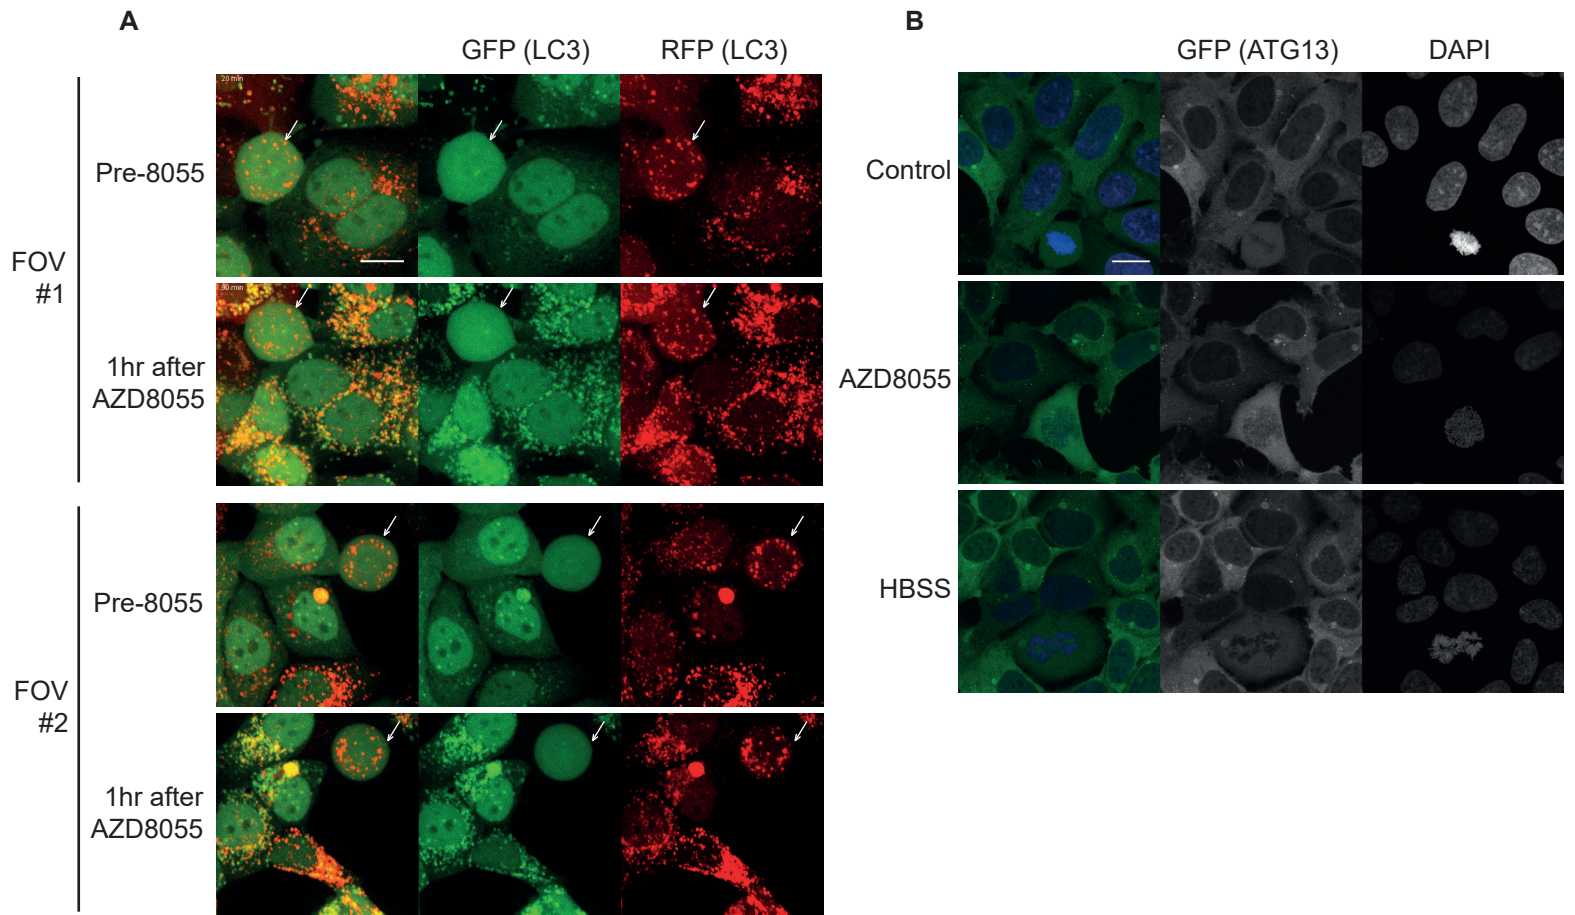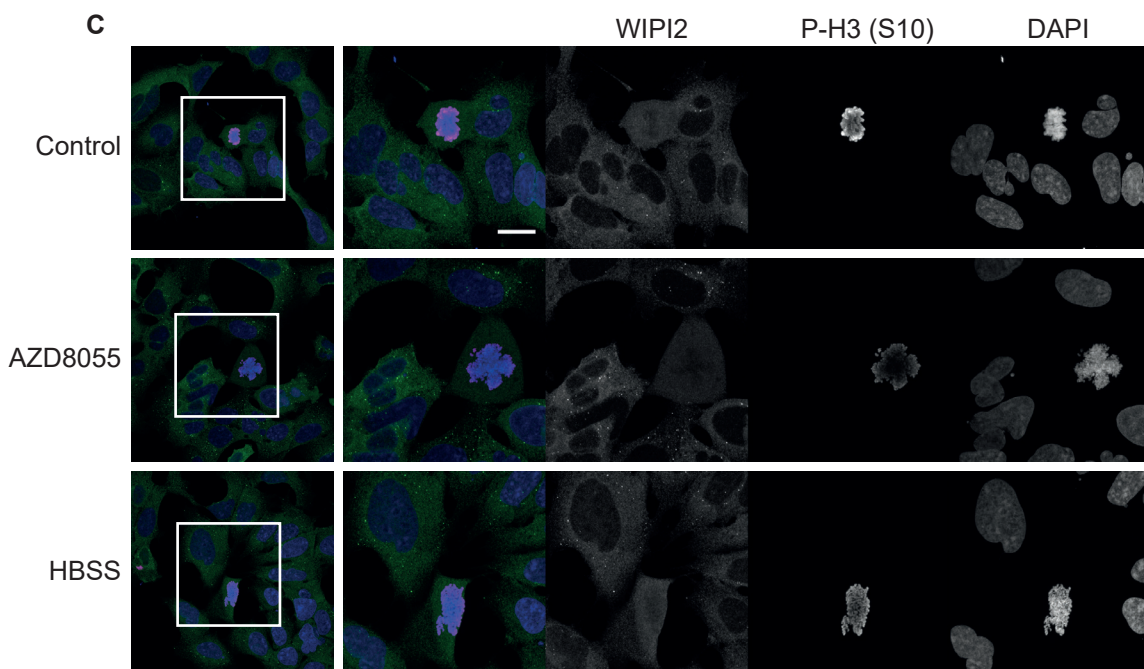

Figure S2 (related to Figure 2)

A

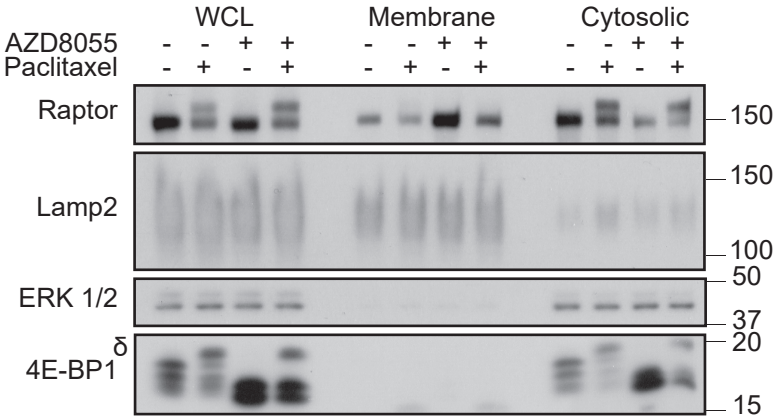

Figure S3 (related to Figure 3)

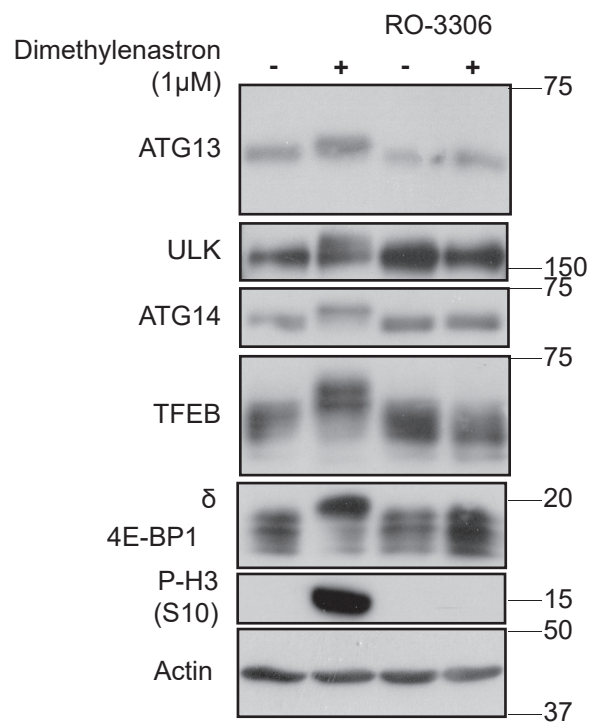

Figure S4 (related to Figure 4)

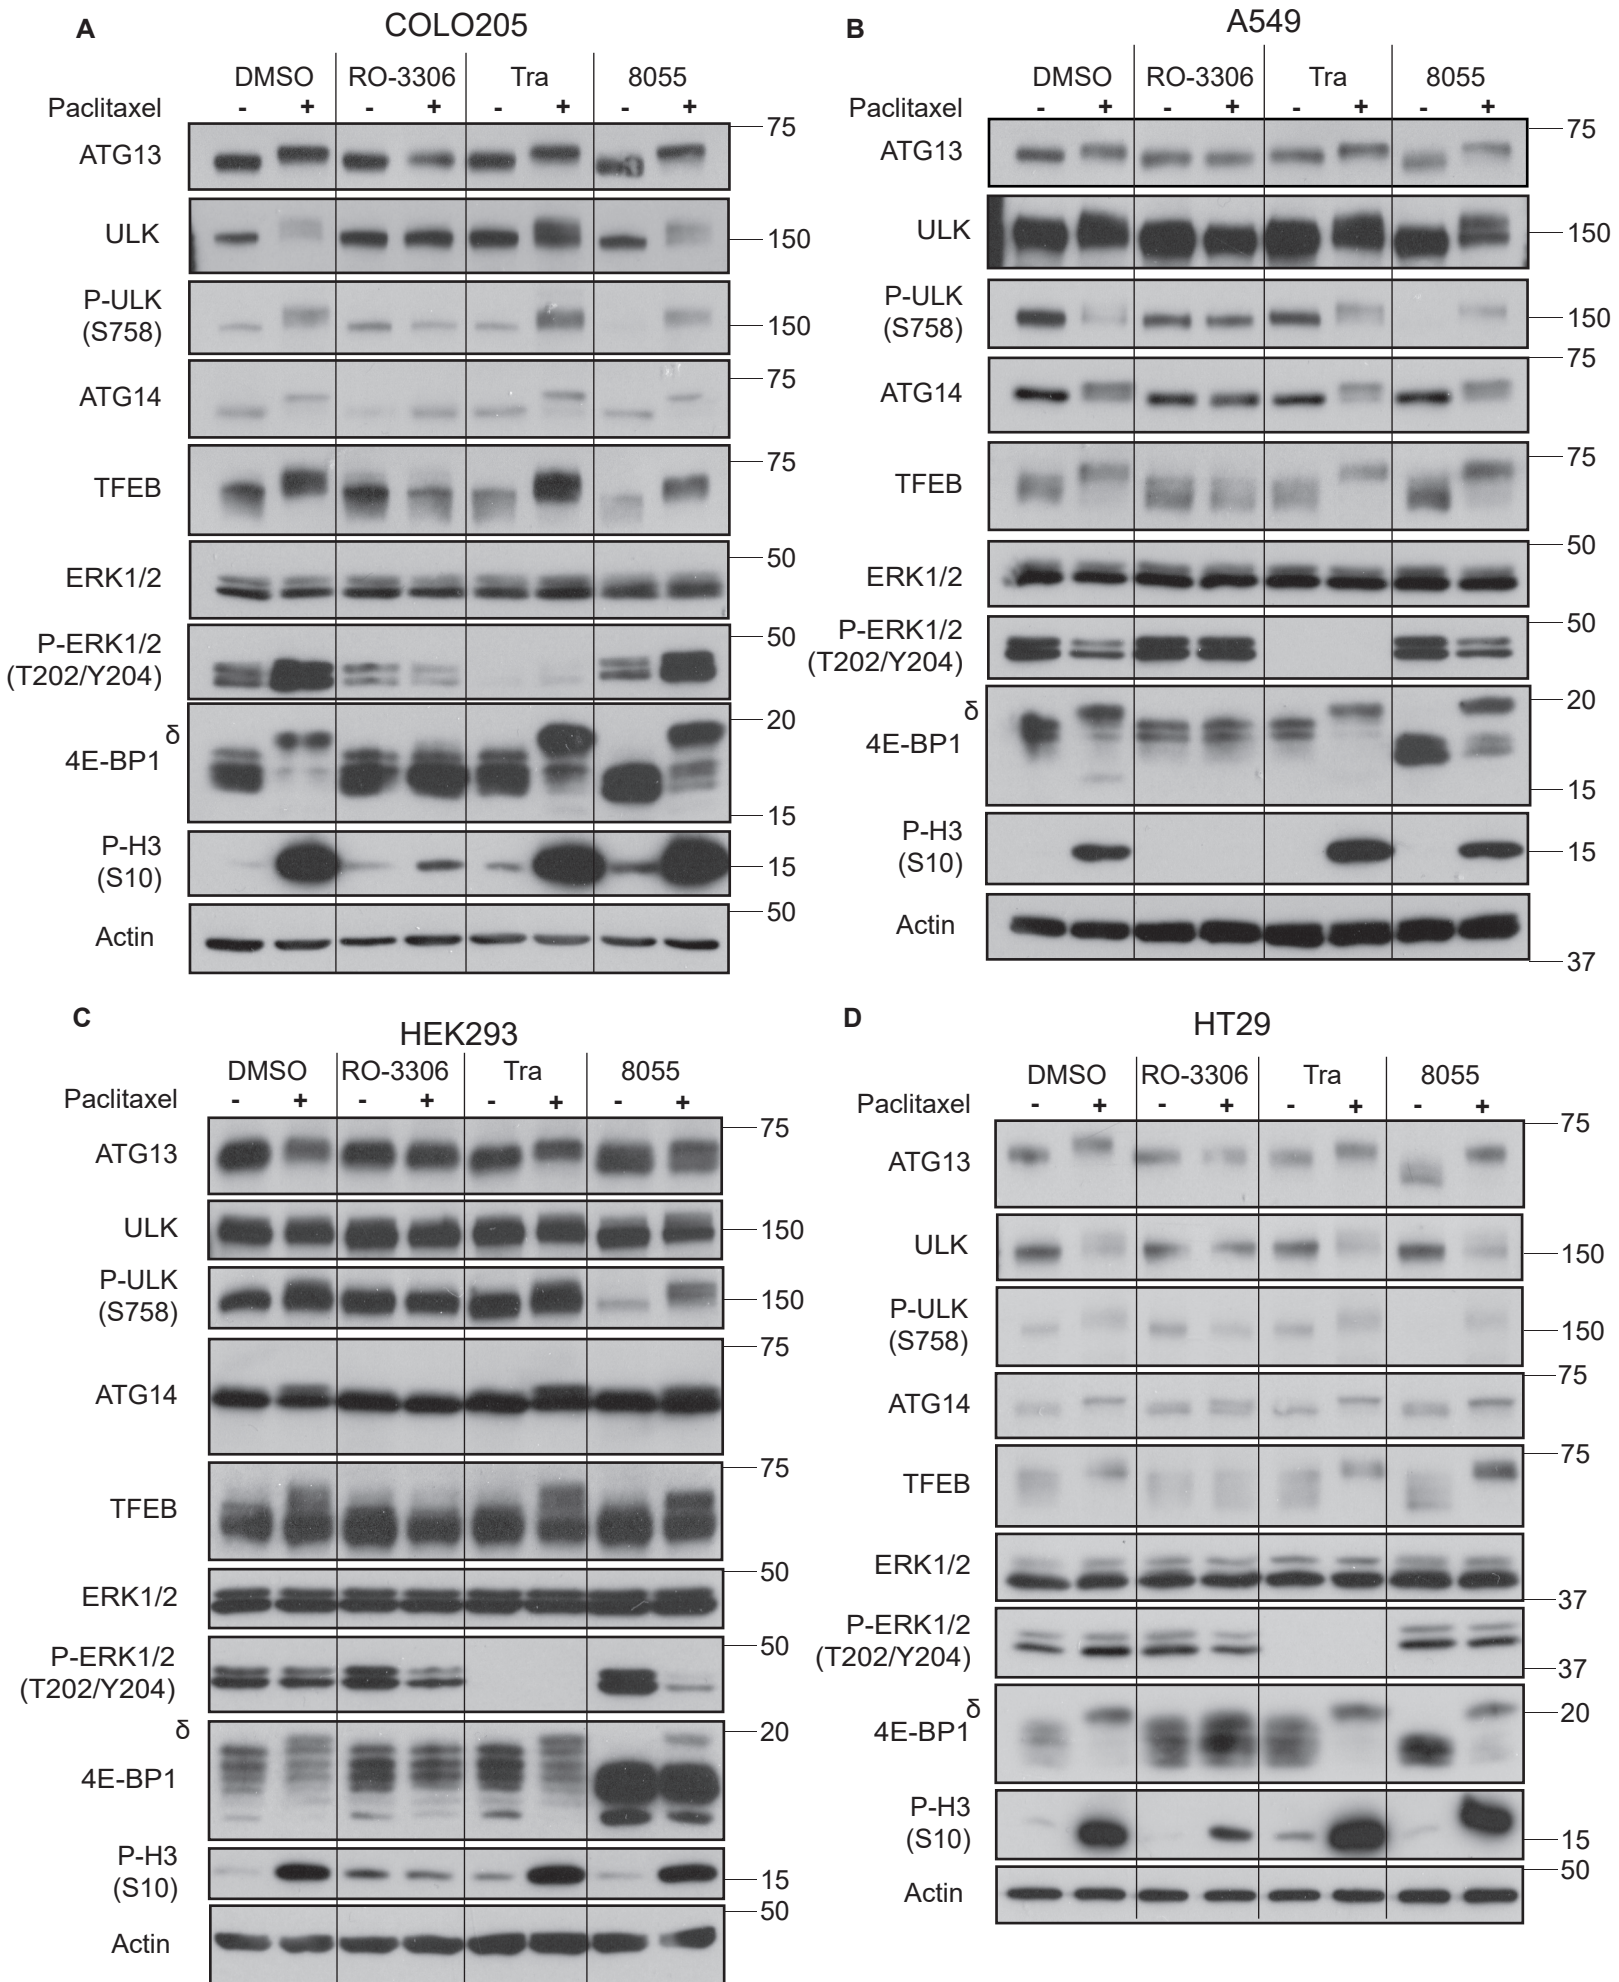

Figure S5 (related to Figure 4)

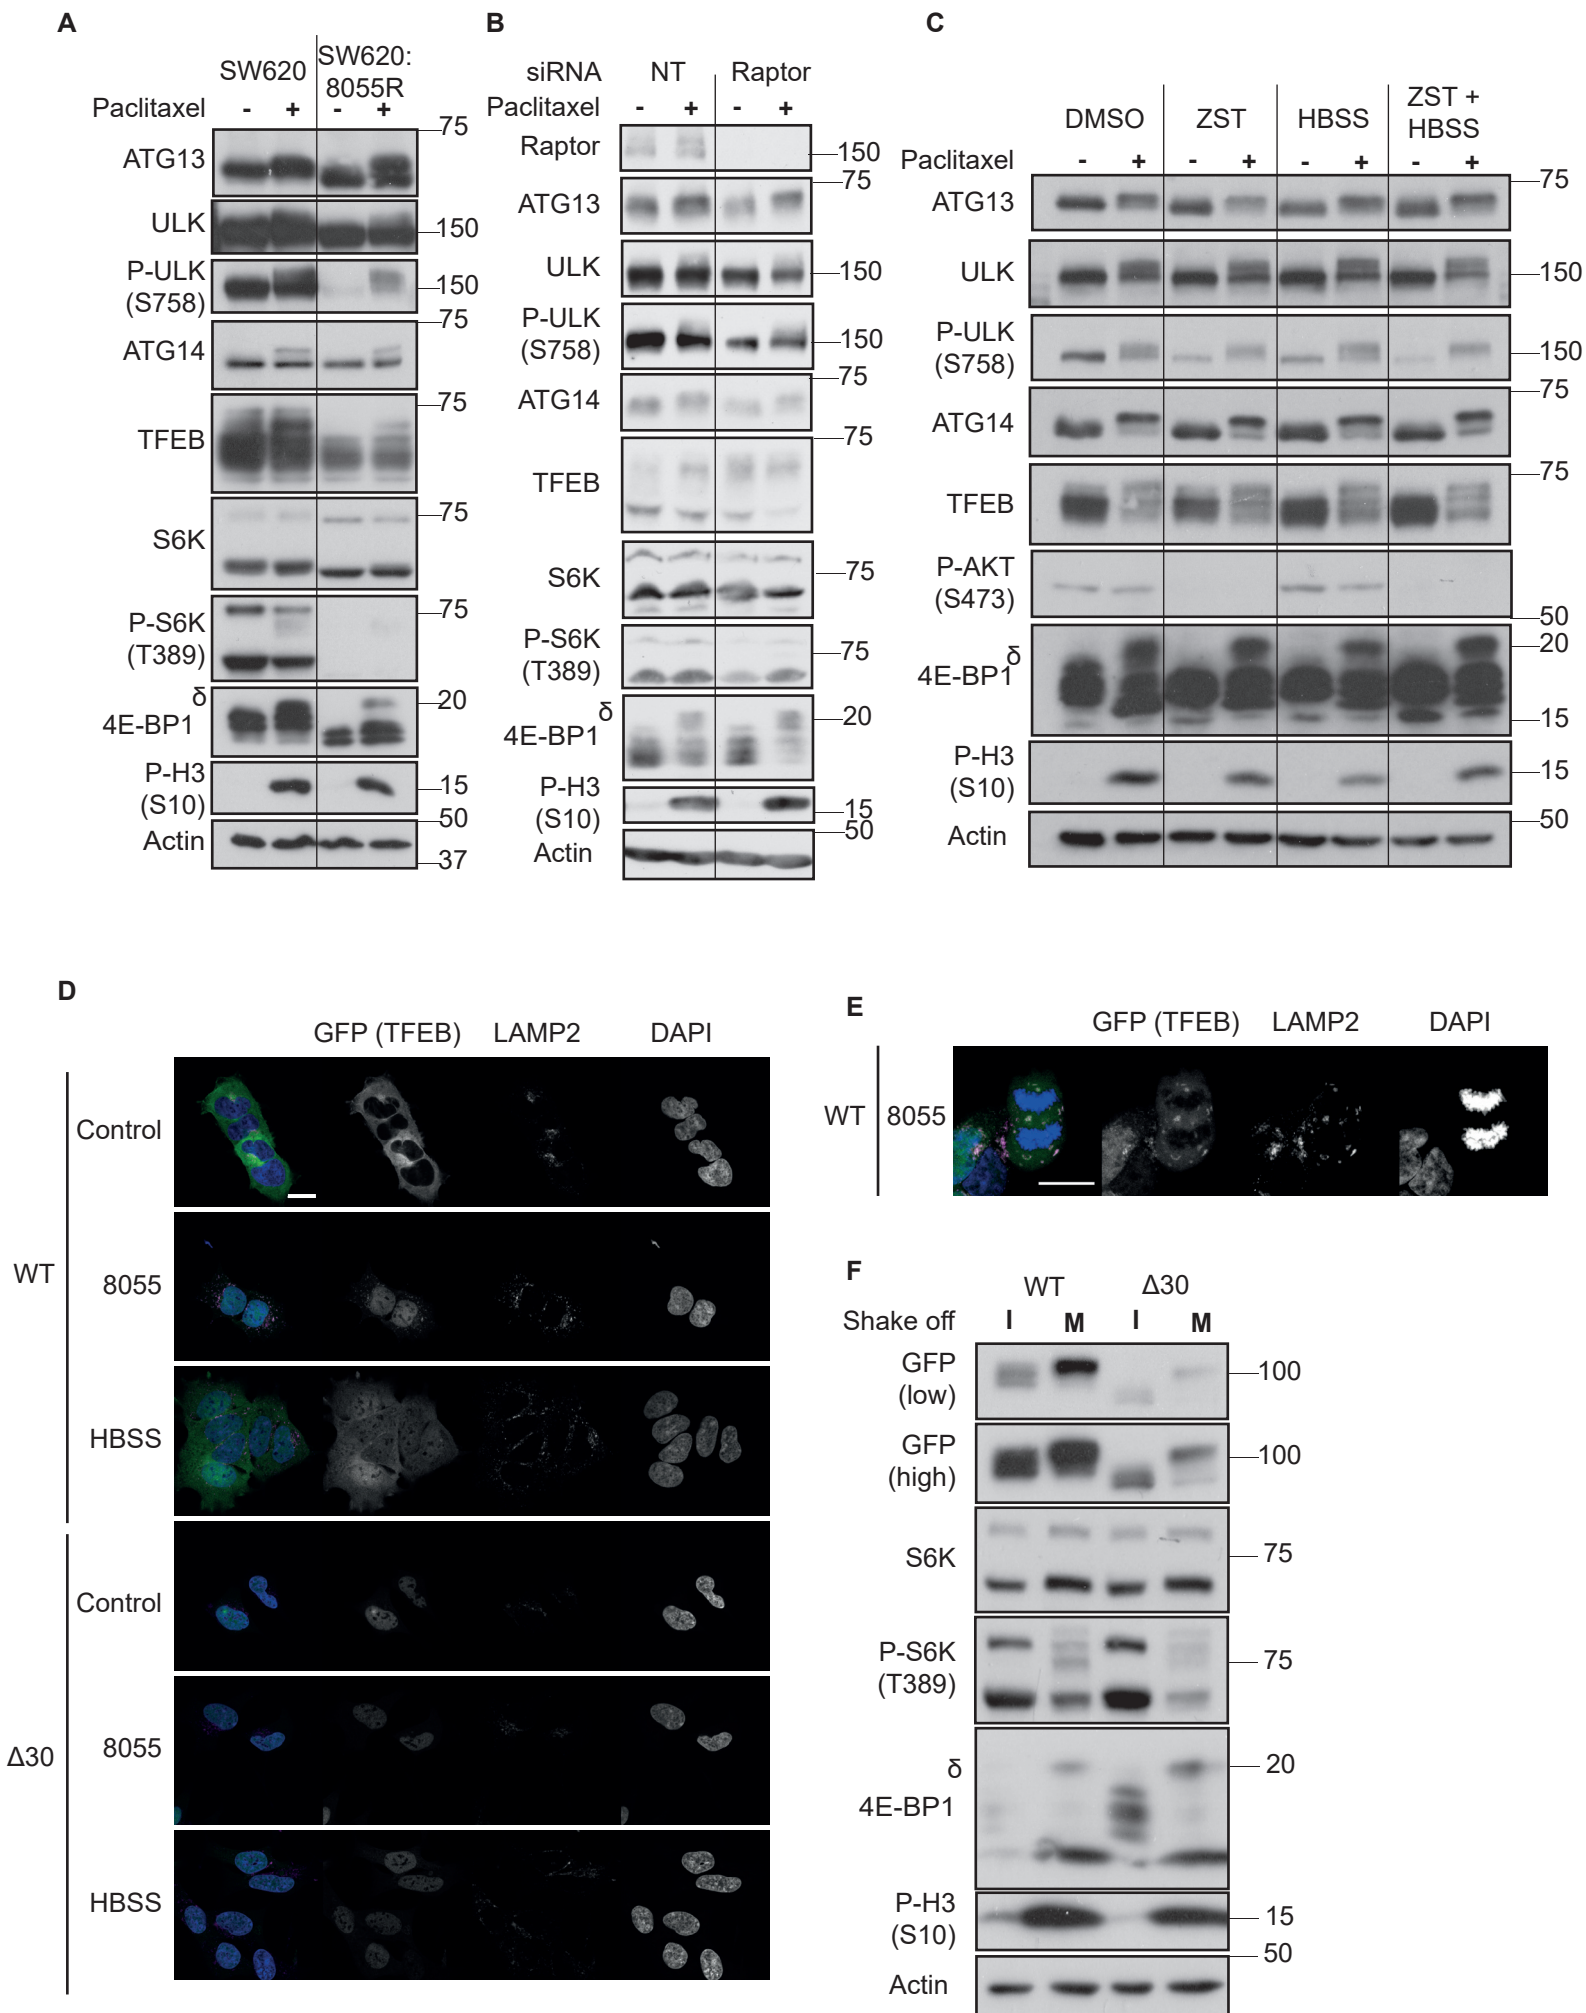



Figure S6 (Related to Figure 5)

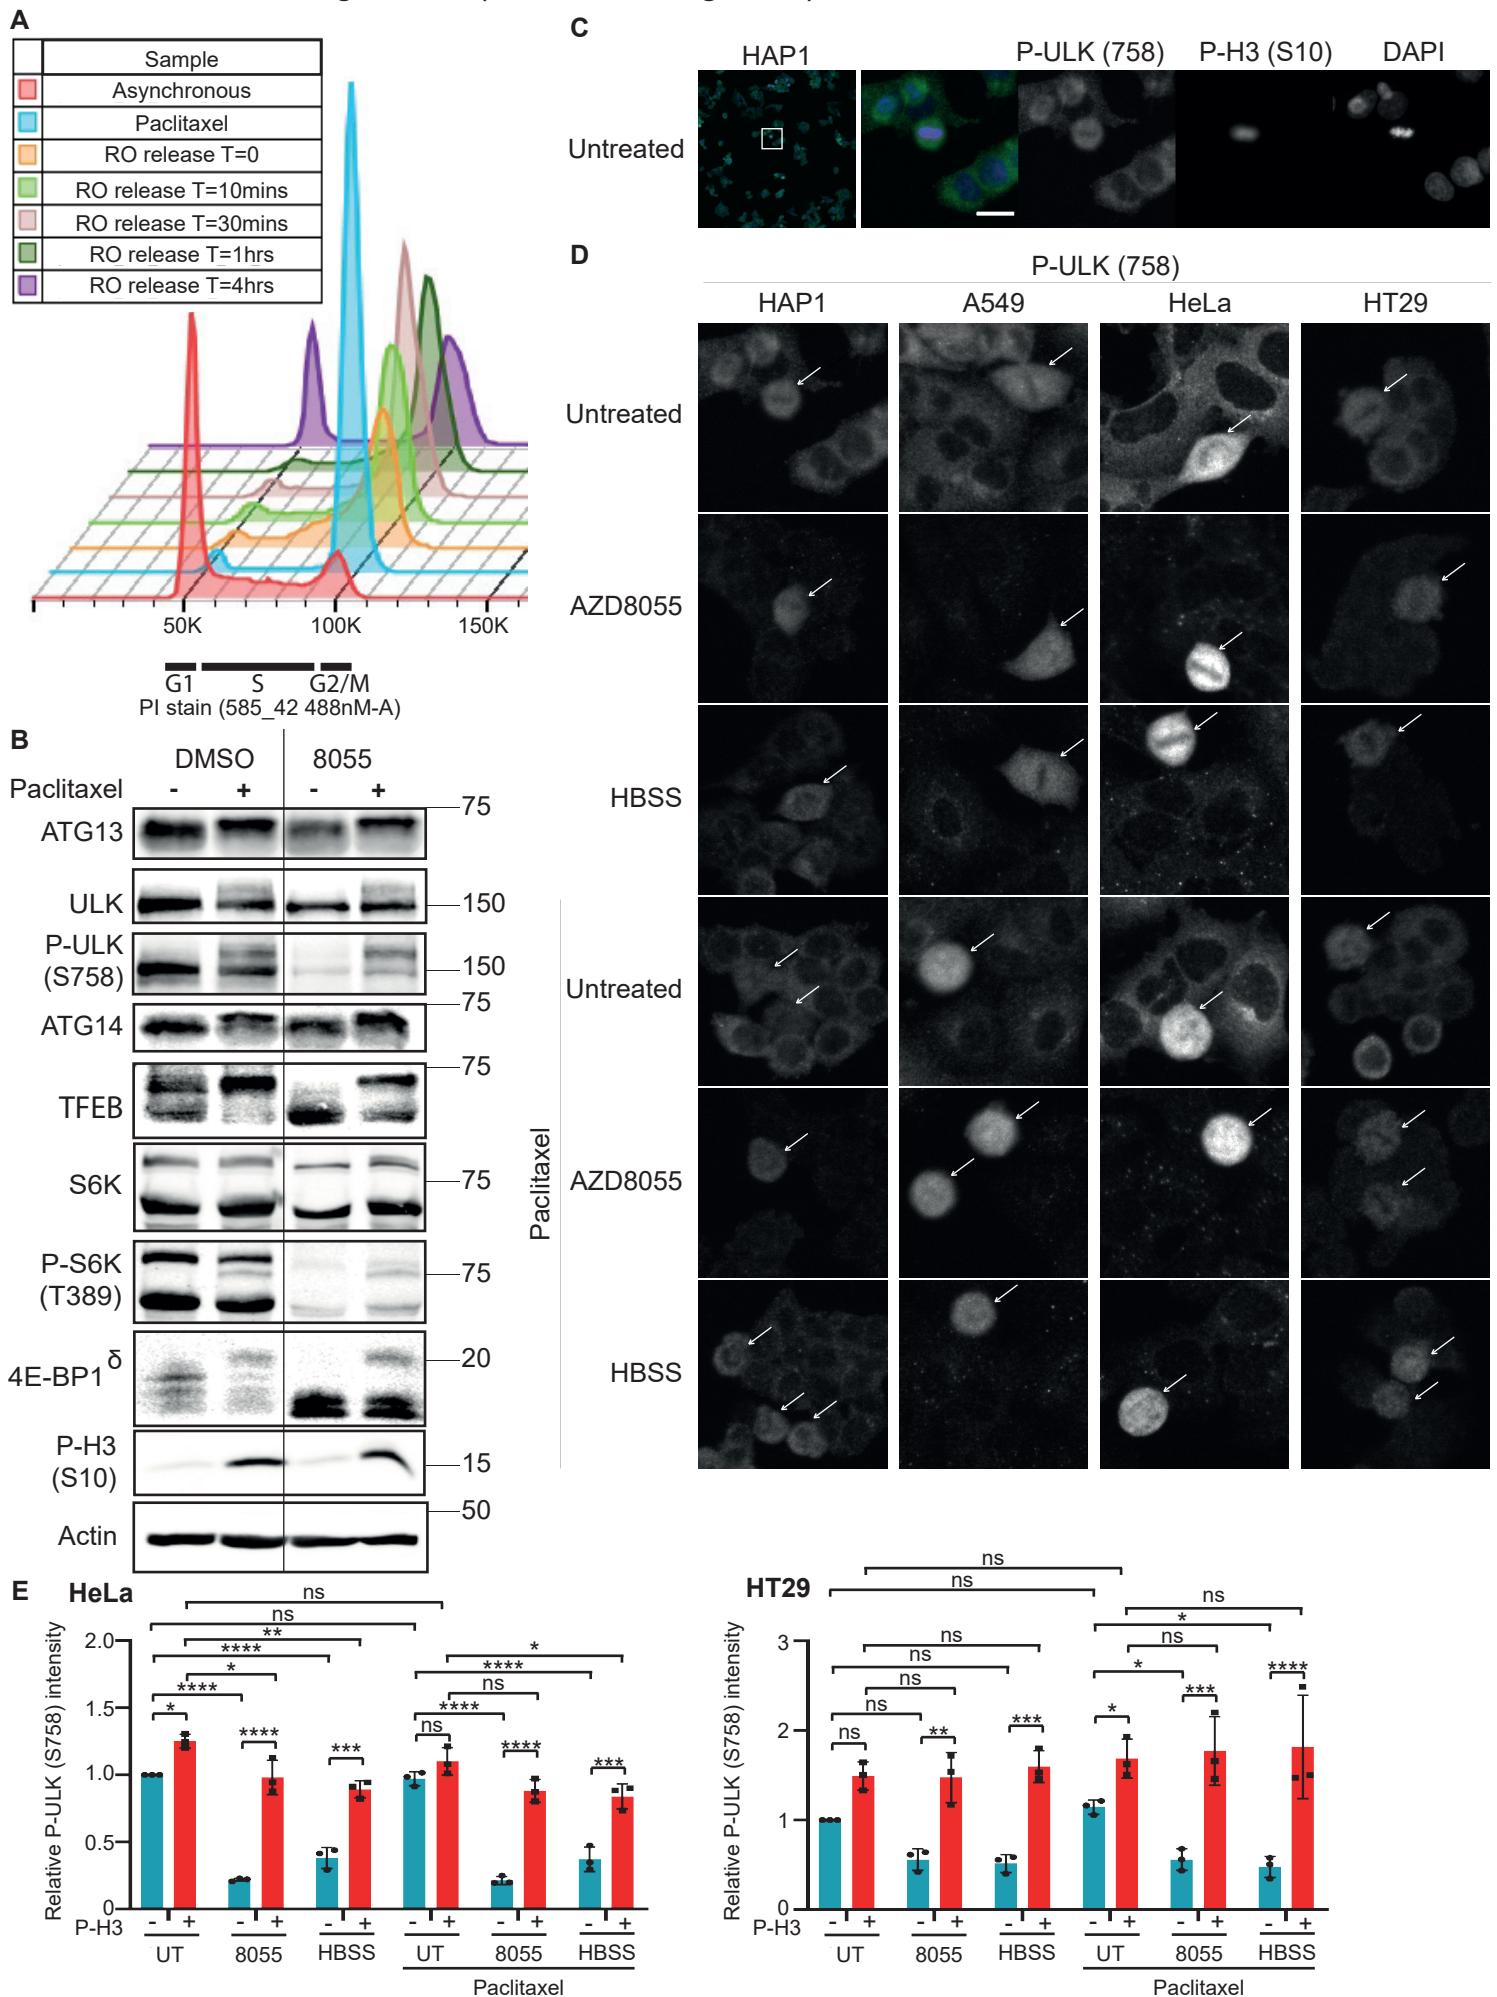

Figure S7 (Related to Figure 6)

**A**

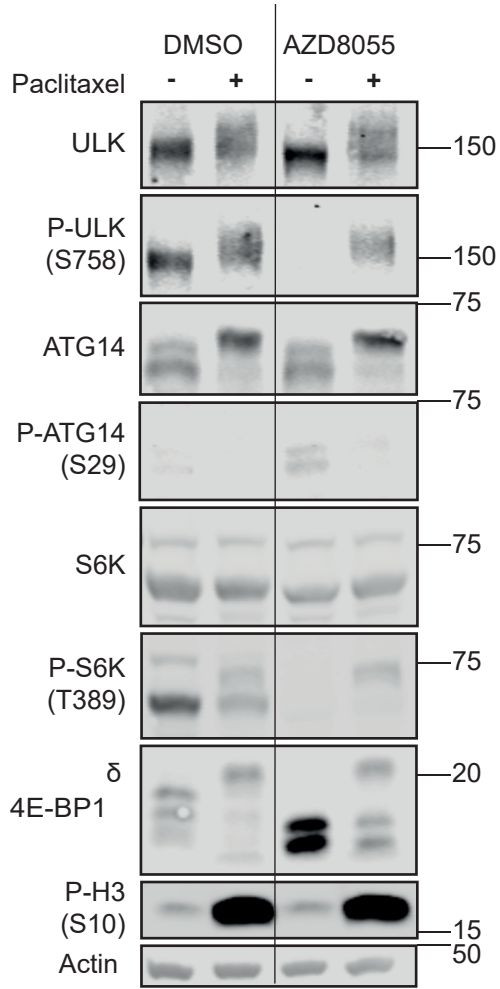

**B**

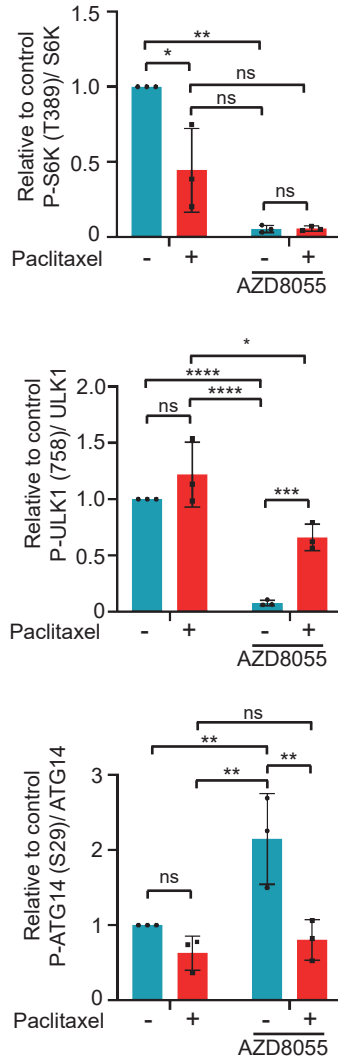

|                                       | Treatment | P-H3 (S10) |        |          |        |
|---------------------------------------|-----------|------------|--------|----------|--------|
|                                       |           | Negative   |        | Positive |        |
|                                       |           | Cells      | Puncta | Cells    | Puncta |
| Figure 1B quantification (ATG13) exp1 | Untreated | 91         | 152    | 17       | 4      |
|                                       | AZD8055   | 73         | 957    | 18       | 21     |
|                                       | HBSS      | 118        | 802    | 25       | 28     |
| Figure 1B quantification (ATG13) exp2 | Untreated | 142        | 375    | 29       | 21     |
|                                       | AZD8055   | 143        | 1558   | 29       | 26     |
|                                       | HBSS      | 110        | 732    | 32       | 24     |
| Figure 1B quantification (ATG13) exp3 | Untreated | 108        | 146    | 25       | 9      |
|                                       | AZD8055   | 91         | 949    | 30       | 23     |
|                                       | HBSS      | 93         | 573    | 22       | 16     |
|                                       |           |            |        |          |        |
| Figure 1E quantification (WIPI2) exp1 | Untreated | 64         | 211    | 12       | 3      |
|                                       | AZD8055   | 116        | 1602   | 14       | 4      |
|                                       | HBSS      | 59         | 499    | 12       | 2      |
| Figure 1E quantification (WIPI2) exp2 | Untreated | 63         | 18     | 13       | 1      |
|                                       | AZD8055   | 69         | 648    | 14       | 3      |
|                                       | HBSS      | 65         | 718    | 15       | 7      |
| Figure 1E quantification (WIPI2) exp3 | Untreated | 85         | 136    | 13       | 2      |
|                                       | AZD8055   | 85         | 993    | 15       | 3      |
|                                       | HBSS      | 129        | 1587   | 18       | 14     |

**Table S1 (Related to Figure 1): Markers of the omegasome are strongly reduced during mitosis.**

Cell and puncta counts (Imaris automated spot counting) for the experiments in Figure 1B and Figure 1E are shown

| Phosphopeptide                                | Site                   |
|-----------------------------------------------|------------------------|
| <b>ATG13 (194-282)</b>                        |                        |
| TPPIMGIIDHFVDRPYPS <u>S</u> PMHPCNYR          | S224                   |
| TAGEDTGVIYPSVEDSQEVCTTSFST <u>S</u> PPSQLSSSR | S259 (known mTOR site) |
| <b>ULK1 (706-827)</b>                         |                        |
| AGGTSSPSPVVFTVG <u>S</u> PPSGSTPPQGPR         | S758 (known mTOR site) |
| AGGTSSPSPVVFTVGSPPSG <u>S</u> TIPPQGPR        | T764                   |
| MFSAGPTG <u>S</u> ASSSAR                      | S781                   |
| <b>ATG14 (348-470)</b>                        |                        |
| NLMYLV <u>S</u> PSSEHLGR                      | S383 (known mTOR site) |
| <u>S</u> GPFEVR                               | S392                   |
| VSDEETDLGTDWENLP <u>S</u> PR                  | S440 (known mTOR site) |
| FCDIPSQSVEVSQSQSTQA <u>S</u> PPIASSSA         | S462                   |

**Table S2 (Related to Figure 6): Sites in ATG13, ULK1 and ATG14 phosphorylated by CCNB1-CDK1 *in vitro***

HAP1 cells were treated with paclitaxel (50nM; t=16 hrs) prior to lysis and subsequent immunoprecipitation of cyclin B1 (or bead-only control). The immunoprecipitated CDK1 was then incubated with indicated GST-tagged protein fragments for 15 minutes at 30°C. GST-tagged fragments were then digested with trypsin and analysed by mass spectrometry as outlined in the methods. Sites phosphorylated by CCNB1-CDK1 in both of two independent experiments are identified in Red underline.
